# Supplementary material for: Antitumor activity and safety of camrelizumab plus famitinib in patients with platinum-resistant recurrent ovarian cancer: results from an open-label, multicenter phase 2 basket study
Source: PubMed Central journal article supplement — J Immunother Cancer. 2022 Jan 11;10(1):e003831. doi: 10.1136/jitc-2021-003831 (PMC8753451; doi:10.1136/jitc-2021-003831), 2022-01-11
Supplement: jitc-2021-003831supp001.pdf [file jitc-2021-003831supp001.pdf]

**Table S1 Definition of clinically significant toxicity.**

| <b>Clinically significant toxicities were reported during the first 2 cycles of the study treatment, and defined as the following AEs, which were considered as treatment-related per investigator assessment:</b> |                                                                                                                                                                                                                             |
|--------------------------------------------------------------------------------------------------------------------------------------------------------------------------------------------------------------------|-----------------------------------------------------------------------------------------------------------------------------------------------------------------------------------------------------------------------------|
| 1                                                                                                                                                                                                                  | Grade 4 hematological toxicity lasted for 3 days or more, $\geq$ grade 3 decreased platelet count accompanying with bleeding, and $\geq$ grade 3 decreased neutrophil count accompanying with fever or infection;           |
| 2                                                                                                                                                                                                                  | Grade 3 or higher non-hematological toxicity (except for abnormal laboratory test), and grade 3 hypertension, skin rash, diarrhea, nausea and vomiting that cannot be controlled by symptomatic treatments;                 |
| 3                                                                                                                                                                                                                  | Grade 3 or higher abnormal laboratory indicators that led to hospitalization or lasted for no less than 7 days;                                                                                                             |
| 4                                                                                                                                                                                                                  | Toxicities that resulted in failure to complete twice administration of camrelizumab during the first two cycles or failure of normal administration of camrelizumab in the third cycle (administration delay for >7 days); |
| 5                                                                                                                                                                                                                  | Toxicities that resulted in famitinib dose interruption lasted for a longest cumulative duration >14 days.                                                                                                                  |

AEs, adverse events.

**Table S2 Tumor responses by platinum status.**

|                               | <b>Primary platinum resistant<br/>(n=11)</b> | <b>Secondary platinum resistant<br/>(n=15)</b> | <b>Primary platinum refractory<br/>(n=11)</b> |
|-------------------------------|----------------------------------------------|------------------------------------------------|-----------------------------------------------|
| Best overall response, n (%)  |                                              |                                                |                                               |
| Complete response             | 0                                            | 0                                              | 0                                             |
| Partial response              | 4 (36.4)                                     | 2 (13.3)                                       | 3 (27.3)                                      |
| Stable disease $\geq$ 6 weeks | 4 (36.4)                                     | 4 (26.7)                                       | 3 (27.3)                                      |
| Progressive disease           | 3 (27.3)                                     | 9 (60.0)                                       | 5 (45.5)                                      |
| ORR, % (95% CI)               | 36.4 (10.9 to 69.2)                          | 13.3 (1.7 to 40.5)                             | 27.3 (6.0 to 61.0)                            |
| DCR, % (95% CI)               | 72.2 (39.0 to 94.0)                          | 40.0 (16.3 to 67.7)                            | 72.7 (39.0 to 94.0)                           |

Patients were categorized as primary platinum resistance (disease progression occurring  $\geq$ 2 months and  $<$ 6 months after completing first-line platinum therapy), secondary platinum resistance (progression  $\geq$ 6 months after completing first-line platinum-based chemotherapy but  $<$ 6 months after completing second-line or later-line platinum-based chemotherapy) and primary platinum refractory (progression  $<$ 2 months or no response during the first-line platinum-based chemotherapy).

ORR, objective response rate; CI, confidence interval; DCR, disease control rate.

**Table S3 Tumor responses in patients with tumor PD-L1 CPS  $\geq 1$  and those with CPS  $< 1$ .**

Mandatory fresh biopsy or archival tissue was not requested at enrollment.

|                               | <b>PD-L1 CPS <math>\geq 1</math></b><br><b>(n=8)</b> | <b>PD-L1 CPS <math>&lt; 1</math></b><br><b>(n=11)</b> |
|-------------------------------|------------------------------------------------------|-------------------------------------------------------|
| Best overall response, n (%)  |                                                      |                                                       |
| Complete response             | 0                                                    | 0                                                     |
| Partial response              | 4 (50.0)                                             | 2 (18.2)                                              |
| Stable disease $\geq 6$ weeks | 1 (12.5)                                             | 4 (36.4)                                              |
| Progressive disease           | 3 (37.5)                                             | 5 (45.5)                                              |
| ORR, % (95% CI)               | 50.0 (15.7 to 84.3)                                  | 18.2 (2.3 to 51.8)                                    |
| DCR, % (95% CI)               | 62.5 (24.5 to 91.5)                                  | 54.5 (23.4 to 83.3)                                   |

ORR, objective response rate; CI, confidence interval; DCR, disease control rate.

**Table S4 TRAEs leading to dose modification.**

| TRAEs, n (%)                                         | All patients (N=37) |           |
|------------------------------------------------------|---------------------|-----------|
|                                                      | Any grade           | Grade 3*  |
| <b>TRAEs leading to interruption of camrelizumab</b> |                     |           |
| Platelet count decreased                             | 4 (10.8)            | 3 (8.1)   |
| Gamma-glutamyltransferase increased                  | 1 (2.7)             | 1 (2.7)   |
| Neutrophil count decreased                           | 1 (2.7)             | 1 (2.7)   |
| Decreased appetite                                   | 1 (2.7)             | 1 (2.7)   |
| Staphylococcal infection                             | 1 (2.7)             | 1 (2.7)   |
| Alanine aminotransferase increased                   | 1 (2.7)             | 0         |
| Tri-iodothyronine decreased                          | 1 (2.7)             | 0         |
| Blood thyroid stimulating hormone increased          | 1 (2.7)             | 0         |
| Thyroxine free decreased                             | 1 (2.7)             | 0         |
| Tri-iodothyronine free decreased                     | 1 (2.7)             | 0         |
| Nausea                                               | 1 (2.7)             | 0         |
| Diarrhoea                                            | 1 (2.7)             | 0         |
| Hepatic function abnormal                            | 1 (2.7)             | 0         |
| Headache                                             | 1 (2.7)             | 0         |
| Hypothyroidism                                       | 1 (2.7)             | 0         |
| Palmar-plantar erythrodysesthesia syndrome           | 1 (2.7)             | 0         |
| Pyrexia                                              | 1 (2.7)             | 0         |
| Asthenia                                             | 1 (2.7)             | 0         |
| Proteinuria                                          | 1 (2.7)             | 0         |
| Renal impairment                                     | 1 (2.7)             | 0         |
| <b>TRAEs leading to interruption of famitinib</b>    |                     |           |
| Hypertension                                         | 11 (29.7)           | 11 (29.7) |
| Neutrophil count decreased                           | 9 (24.3)            | 8 (21.6)  |
| Platelet count decreased                             | 6 (16.2)            | 3 (8.1)   |
| Palmar-plantar erythrodysesthesia syndrome           | 4 (10.8)            | 2 (5.4)   |

|                                                |         |         |
|------------------------------------------------|---------|---------|
| Gamma-glutamyltransferase increased            | 3 (8.1) | 3 (8.1) |
| Alanine aminotransferase increased             | 2 (5.4) | 1 (2.7) |
| Pyrexia                                        | 2 (5.4) | 0       |
| Proteinuria                                    | 2 (5.4) | 0       |
| White blood cell count decreased               | 1 (2.7) | 1 (2.7) |
| Aspartate aminotransferase increased           | 1 (2.7) | 1 (2.7) |
| Abdominal distension                           | 1 (2.7) | 1 (2.7) |
| Mouth ulceration                               | 1 (2.7) | 1 (2.7) |
| Hypomagnesaemia                                | 1 (2.7) | 1 (2.7) |
| Hypertriglyceridemia                           | 1 (2.7) | 1 (2.7) |
| Decreased appetite                             | 1 (2.7) | 1 (2.7) |
| Staphylococcal infection                       | 1 (2.7) | 1 (2.7) |
| Lymphocyte count decreased                     | 1 (2.7) | 0       |
| Protein urine present                          | 1 (2.7) | 0       |
| Blood thyroid stimulating hormone increased    | 1 (2.7) | 0       |
| Blood pressure increased                       | 1 (2.7) | 0       |
| Drug eruption                                  | 1 (2.7) | 0       |
| Nausea                                         | 1 (2.7) | 0       |
| Diarrhea                                       | 1 (2.7) | 0       |
| Abdominal pain upper                           | 1 (2.7) | 0       |
| Urinary tract infection                        | 1 (2.7) | 0       |
| Asthenia                                       | 1 (2.7) | 0       |
| Renal impairment                               | 1 (2.7) | 0       |
| Headache                                       | 1 (2.7) | 0       |
| RCCEP                                          | 1 (2.7) | 0       |
| Hypothyroidism                                 | 1 (2.7) | 0       |
| Vaginal hemorrhage                             | 1 (2.7) | 0       |
| Myocardial ischemia                            | 1 (2.7) | 0       |
| <b>TRAEs leading to reduction of famitinib</b> |         |         |

|                                    |         |         |
|------------------------------------|---------|---------|
| Platelet count decreased           | 2 (5.4) | 1 (2.7) |
| Blood pressure increased           | 1 (2.7) | 1 (2.7) |
| Neutrophil count decreased         | 1 (2.7) | 1 (2.7) |
| Gingivitis                         | 1 (2.7) | 1 (2.7) |
| Alanine aminotransferase increased | 1 (2.7) | 0       |
| Hepatic function abnormal          | 1 (2.7) | 0       |

TRAEs, treatment-related adverse events; RCCEP, reactive cutaneous capillary endothelial proliferation.

\*No grade 4 or 5 TRAEs leading to dose modification occurred.

**Table S5 Immune-mediated adverse events regardless of attribution to study treatment.**

| Immune-mediated adverse events, n (%)       | All patients (N=37) |          |
|---------------------------------------------|---------------------|----------|
|                                             | Any grade           | Grade 3* |
| Any                                         | 12 (32.4)           | 1 (2.7)  |
| Hypothyroidism                              | 5 (13.5)            | 0        |
| Diarrhea                                    | 3 (8.1)             | 1 (2.7)  |
| Hyperthyroidism                             | 3 (8.1)             | 0        |
| RCCEP                                       | 2 (5.4)             | 0        |
| Immune-mediated hypothyroidism              | 1 (2.7)             | 0        |
| Abdominal pain                              | 1 (2.7)             | 0        |
| Tri-iodothyronine decreased                 | 1 (2.7)             | 0        |
| Blood thyroid stimulating hormone increased | 1 (2.7)             | 0        |
| Thyroxine free decreased                    | 1 (2.7)             | 0        |
| Tri-iodothyronine free decreased            | 1 (2.7)             | 0        |
| Papule                                      | 1 (2.7)             | 0        |
| Pyrexia                                     | 1 (2.7)             | 0        |

\*No grade 4 or 5 immune-mediated adverse events occurred.

RCCEP, reactive cutaneous capillary endothelial proliferation.

**Table S6 Treatment-related SAEs.**

| Treatment-related SAEs, n (%)    | All patients (N=37) |                |
|----------------------------------|---------------------|----------------|
|                                  | Any grade           | Grade $\geq 3$ |
| Platelet count decreased         | 2 (5.4)             | 2 (5.4)        |
| Peritonitis                      | 1 (2.7)             | 1 (2.7)        |
| Staphylococcal infection         | 1 (2.7)             | 1 (2.7)        |
| White blood cell count decreased | 1 (2.7)             | 1 (2.7)        |
| Intestinal obstruction           | 1 (2.7)             | 1 (2.7)        |
| Small intestinal perforation     | 1 (2.7)             | 1 (2.7)        |
| Decreased appetite               | 1 (2.7)             | 1 (2.7)        |
| Bile duct stone                  | 1 (2.7)             | 1 (2.7)        |
| Bile duct stenosis               | 1 (2.7)             | 1 (2.7)        |
| Hemorrhage                       | 1 (2.7)             | 1 (2.7)        |
| Neutrophil count decreased       | 1 (2.7)             | 0              |
| Arthralgia                       | 1 (2.7)             | 0              |
| Anemia                           | 1 (2.7)             | 0              |

SAEs, serious adverse events.
